# Supplementary material for: WITHDRAWN: Serum peptide barcode and peptidome profile of horses with Equine Gastric Ulcer Syndrome
Source: Research Square preprint supplement (doi:10.21203/rs.3.rs-6918903/v1), 2025-07-03
Supplement: Supplementary file 1 [file cfc2cfd9187d5895ec8721e9.docx]

**Supplementary data**

**Table S1** The peptide expression in 3 sample groups analysed using LC-MS/MS

| **Survey normal group = 48 peptides** | | | | | |
| --- | --- | --- | --- | --- | --- |
| **Amino acid sequence** | | **Uniprot accession number** | **Protein name** | |
| PGREEVAR | | A0A3Q2GUA8 | Myosin phosphatase Rho interacting protein | |
| ECEACNCHGKAEECYY | | A0A9L0S296 | Laminin subunit alpha 2 | |
| GNIGGSVN | | A0A5F5PV25 | Leucine rich repeat containing 31 | |
| VPSDSPPI | | A0A9L0S2M7 | AVL9 cell migration associated | |
| NGAVTSVN | | F7CDX1 | Fatty acid 2-hydroxylase | |
| DSVFFSCH | | A0A3Q2IAE8 | DS cell adhesion molecule like 1 | |
| VVKQLNQVQ | | A0A9L0R8K6 | Dynein cytoplasmic 2 heavy chain 1 | |
| SEAIIVGG | | F6ZKM9 | Solute carrier family 5 member 7 | |
| NTVGGTVN | | F7BX86 | non-specific serine/threonine protein kinase | |
| DECSQDPCH | | A0A9L0R6P8 | Nidogen 2 | |
| VRHPMTARRAQRV | | Q66776 | Genome polyprotein | |
| STWRYGRGRGVGTVTMVSWG | | F7C9J5 | Fibroblast growth factor receptor | |
| NRKKKLMVF | | A0A3Q2IA92 | ATP-dependent RNA helicase | |
| VITGKGPL | | A0A9L0RP39 | Glycosyl transferase family 1 domain-containing protein | |
| KNVVGGQR | | A0A9L0SG18 | 14-3-3 domain-containing protein | |
| PVKLPCSML | | A0A3Q2H2K2 | NIF system FeS cluster assembly NifU N-terminal domain-containing protein | |
| YLFTYVFTGELWAFLVGW | | A0A9L0R037 | Cationic amino acid transporter C-terminal domain-containing protein | |
| AFGCGARVCLG | | A0A3Q2H5P6 | Steroid 21-hydroxylase | |
| KKRPEECDCHKIRKGLQEK | | A0A9L0TES0 | Arylsulfatase | |
| LNYRNSTLSD | | A0A9L0R5I5 | SH3 domain binding protein 4 | |
| ISVCSQDCS | | A0A3Q2I4Y2 | Apoptotic peptidase activating factor 1 | |
| VDIVPSVG | | A0A3Q2HBH3 | Vestigial like family member 3 | |
| EEESCEFSSALEYL | | A0A3Q2H8D1 | Sterol regulatory element-binding protein 2 | |
| PHENSQDLFP | | F6SPF8 | Interleukin 17 receptor B | |
| FYFPGRVWSLWA | | A0A3Q2KTU8 | E3 ubiquitin-protein ligase MARCHF8 | |
| VSPQEEAHY | | A0A9L0T2I2 | Sp7 transcription factor | |
| RVVVGSPR | | A0A3Q2HI02 | TLC domain containing 1 | |
| GAGASSSS | | O42066 | 64 | |
| DGMPGSPP | | A0A9L0R3B9 | SAM and SH3 domain containing 1 | |
| LDGAPTAA | | F6TAT5 | Glutathione hydrolase | |
| LSLLCGNSSVGDNALRH | | F6U4K7 | Zinc finger protein 157 | |
| VVKVMRPAVG | | A0A060VD37 | Polyprotein | |
| ENWKENSEYKRLKH | | A0A3Q2HDY3 | VWFA domain-containing protein | |
| IKLSTAIKRNENMAK | | K9KCK9 | Signal recognition particle 68 kDa protein-like protein | |
| KPLSKELTLGNLLRLRLARL | | F6T1N3 | Family with sequence similarity 83 member D | |
| KLKHKRKLKKLQTDL | | A0A5F5PN65 | Coiled-coil domain containing 192 | |
| EDASQFIED | | A0A9L0RVC7 | WD repeat-containing protein 35 | |
| ESHWRMLLQDMLTMQQNVYTCLD | | F6PSY6 | NBAS subunit of NRZ tethering complex | |
| HTGDAPFQCWLC | | A0A5F5Q0K5 | ZFP64 zinc finger protein | |
| EEEEEEDNDDD | | K9KCN1 | F-box only protein 3-like protein | |
| AVAVCLLLLLLVL | | A0A9L0R5W6 | Netrin receptor UNC5 | |
| PGRLLRPLPRPLALAALLLLLLLR | | F7CZH3 | protein disulfide-isomerase | |
| GVMEVKVLRT | | F6VU44 | Solute carrier family 8 member A3 | |
| CCCANTEY | | F7BTD8 | Fibrillin 1 | |
| GPTGKEVHVQQ | | F6QX27 | Ankyrin repeat domain 54 | |
| CAPGACGGGSCCP | | F6TKU9 | Sortilin related VPS10 domain containing receptor 1 | |
| GGGGGGGG | | F6YXA5 | Striatin 4 | |
| GVQSRRRSCENGDSCPGC | | F6Q1V3 | Semaphorin 5B | |
| **Survey mild group = 25 peptides** | | | | | |
| **Amino acid sequence** | **Uniprot accession number** | | **Protein name** | | | |
| MKRSSVSTGGAGRLSMQDLR | A0A9L0TU71 | | Kinetochore protein NDC80 | | | |
| PIEEEKGYS | F6VUH0 | | Leucine-rich repeat-containing protein 51 | | | |
| LAAAPAPL | F6Z513 | | Mex-3 RNA binding family member C | | | |
| TVAGSSFV | F6Q3A9 | | Sodium/nucleoside cotransporter | | | |
| LPMWIFMSIALRN | F6WVV8 | | Cytochrome c oxidase assembly factor COX18 | | | |
| PAALRTRA | A0A3Q2H2A0 | | phosphatidylinositol-3-phosphatase | | | |
| NGLKTAAA | F6ZUX0 | | sn-1-specific diacylglycerol lipase | | | |
| PSGIYNINVTTSVT | A0A9L0SE58 | | Cyclin-dependent kinase-like 2 | | | |
| LPAALRGLAGH | A0A3Q2IED1 | | inositol-1,3,4-trisphosphate 5/6-kinase | | | |
| LSLSSEGSYLL | L7MRW5 | | U5 small nuclear ribonucleoprotein 40 kDa-like protein | | | |
| KNVVKPSFL | A0A9L0SEC6 | | Uncharacterized protein | | | |
| CMDDDDDDDDVGDHDED | A0A9L0TF57 | | 116 kDa U5 small nuclear ribonucleoprotein component | | | |
| THEYHVWPGYDYVGWR | A0A9L0R1Q9 | | receptor protein-tyrosine kinase | | | |
| DLTSLETMSEM | A0A5F5PM31 | | RNA uridylyltransferase | | | |
| FCSCCKDVWHAEVSC | A0A3Q2GYN2 | | RBR-type E3 ubiquitin transferase | | | |
| KESLKEYLADRRYCVTQL | A0A3Q2HP03 | | LON peptidase N-terminal domain and ring finger 1 | | | |
| GNDNGCAA | A0A9L0TA31 | | BTB domain containing 8 | | | |
| VLNGWHGE | A0A9L0RTE6 | | DNA helicase | | | |
| LPVLLFLAAVLLPFFPAS | O19010 | | Cysteine-rich secretory protein 3 | | | |
| SDDDEDSEDSEIDMEDDEED | K9KFN1 | | Clusterin-associated protein 1-like protein | | | |
| IKQATRILQH | F6WKC0 | | Chromosome 21 C5orf34 homolog | | | |
| KELEDNLLYKLSAT | A0A9L0SSP7 | | Dynein axonemal heavy chain 8 | | | |
| EPIEDLSPNR | A0A9L0S739 | | ATPase 13A1 | | | |
| ETFWKLSSLEYL | A0A9L0S818 | | Podocan | | | |
| GGDFGGGG | F7AJW0 | | polynucleotide adenylyltransferase | | | |
| **Survey severe group = 35 peptides** | | | |
| **Amino acid sequence** | **Uniprot accession number** | | **Protein name** |
| KARLPDPNLLEVGR | F6XCK0 | | Semaphorin 5A |
| RGRAPAAL | A0A9L0TDA6 | | Uncharacterized protein |
| AEGPVGSHQDHNAHVAQG | A0A5F5Q0D9 | | Olfactory receptor |
| KKTRKYDII | A0A3Q2HGK4 | | Family with sequence similarity 174 member B |
| DLQPVTYSE | Q95LQ3 | | Smad2 |
| PVHPILGG | F6YB05 | | Oligodendrocyte transcription factor 3 |
| TQLAVNKIK | K9KC12 | | T-complex protein 1 subunit eta |
| PVTISQNP | A0A3Q2IDR8 | | MLLT10 histone lysine methyltransferase DOT1L cofactor |
| GAPDLMLGFM | A0A3Q2GW34 | | Kelch like family member 34 |
| FIGSEGFPGVYPPNS | F6UP14 | | Procollagen C-endopeptidase enhancer 2 |
| ATQKATVLTT | A0A3Q2HGJ0 | | VWFA domain-containing protein |
| LSVNNSIFYRP | A0A9L0ST90 | | RNA helicase |
| PDYISHFQEQNDLKGLL | K9KAP0 | | Type II inositol-3,4-bisphosphate 4-phosphatase-like protein |
| SAPHASDSYYRLMMSL | F7DE18 | | Coiled-coil domain-containing protein 80 |
| PEDFMDEEVF | A0A9L0R776 | | G-patch domain containing 1 |
| FIGKLKLLILLRVAKRKNLL | F6W7R5 | | DNA-directed primase/polymerase protein |
| RPPFGQGYTQP | A0A9L0TJM9 | | Trafficking from ER to golgi regulator |
| DLNLPNAVITRIIKEAL | A0A3Q2ICV7 | | DNA polymerase epsilon subunit 3 |
| RMVPISKQPKEK | F6QI12 | | Nucleolar protein 4 |
| VNRCRRRNPQKLIKLKTN | F6Y3H3 | | Large ribosomal subunit protein bL32m |
| ILLRGKETLHRKTFE | A0A9L0SDZ2 | | Intercellular adhesion molecule 2 |
| KKRDRVDH | K9KFV8 | | Centrosome-associated protein 350-like protein |
| GGGGGEGG | A0A3Q2HA74 | | Protocadherin 10 |
| LLLLLLLPQRDCPRAA | A0A9L0RD51 | | MHC class I-like antigen recognition-like domain-containing protein |
| EPLSGNKE | A0A3Q2H0J2 | | YLP motif containing 1 |
| LAVEAWYRPSCL | F6SSF3 | | Synapse differentiation inducing 1 like |
| QPVEDHTDI | A0A5F5Q299 | | Cadherin 12 |
| ISAVIVICTLIFLAVL | A0A3Q2HLX5 | | AIG1-type G domain-containing protein |
| DIDCEDQSDEH | A0A3Q2HLW4 | | LDL receptor related protein 1B |
| DDDDDDDDEDDD | K9KA51 | | Unconventional prefoldin RPB5 interactor-like protein |
| DNEDEDDDDDDDDDDDDD | F6Z1R3 | | Calsequestrin |
| LTSKEYEEIDRRLFEARTAL | A0A3Q2IK56 | | Phospholipid-transporting ATPase |
| VIWCFVVRTSISRMM | A0A6B7RBS2 | | Genome polyprotein |
| DNFGRGGNFSGRGGFGGS | A0A9L0STE5 | | Heteroous nuclear ribonucleoprotein A1 |
| LLLLLLLL | A0A3Q2KRW6 | | GnRH-associated peptide (GnRH-associated peptide)] |
